# Supplementary material
Source: PubMed Central journal article supplement (PMC2953265)
Supplement: NIHMS238344-supplement-1_si_001.pdf [file NIHMS238344-supplement-1_si_001.pdf]

Supporting Information for:

## Unprecedented Fe(IV) Species in a Diheme Protein MauG: A Quantum Chemical

### Investigation on the Unusual Mössbauer Spectroscopic Properties

Yan Ling,<sup>1</sup> Victor L. Davidson,<sup>2</sup> and Yong Zhang<sup>1,3\*</sup>

<sup>1</sup>Department of Chemistry and Biochemistry, University of Southern Mississippi, 118 College Drive #5043, Hattiesburg, MS 39406; <sup>2</sup>Department of Biochemistry, University of Mississippi Medical Center, 2500 N. State Street, Jackson, MS 39216; <sup>3</sup>Department of Chemistry, Chemical Biology, and Biomedical Engineering, Stevens Institute of Technology, Castle Point on Hudson, Hoboken, NJ 07030

#### Computational Details:

The <sup>57</sup>Fe quadrupole splitting arises from the non-spherical nuclear charge distribution in the I<sup>\*</sup>=3/2 excited state in the presence of an electric field gradient at the <sup>57</sup>Fe nucleus, while the isomer shift arises from differences in the electron density at the nucleus between the absorber (the molecule or system of interest) and a reference compound (usually  $\alpha$ -Fe at 300K). The former effect is related to the components of the electric field gradient (EFG) tensor at the nucleus as follows:<sup>1</sup>

$$\Delta E_Q = \frac{1}{2} eQV_{zz} \left( 1 + \frac{\eta^2}{3} \right)^{1/2} \quad (1)$$

where  $e$  is the electron charge,  $Q$  is the quadrupole moment of the E<sup>\*</sup>=14.4 keV excited state, and the principal components of the EFG tensor are labeled according to the convention:

$$|V_{zz}| > |V_{yy}| > |V_{xx}| \quad (2)$$

with the asymmetry parameter being given by:

$$\eta = \frac{V_{xx} - V_{yy}}{V_{zz}} \quad (3)$$

The isomer shift in <sup>57</sup>Fe Mössbauer spectroscopy is given by:<sup>1</sup>

$$\delta_{Fe} = E_A - E_{Fe} = \frac{2\pi}{3} Ze^2 \left( \langle R^2 \rangle^* - \langle R^2 \rangle \right) \left( |\psi(0)|_A^2 - |\psi(0)|_{Fe}^2 \right) \quad (4)$$

where  $Z$  represents the atomic number of the nucleus of interest (iron) and  $R$ ,  $R^*$  are average nuclear radii of the ground and excited states of <sup>57</sup>Fe. Since  $|\psi(0)|_{Fe}^2$  is a constant, the isomer shift (from Fe) can be written as:

$$\delta_{Fe} = \alpha [ \rho(0) - c ] \quad (5)$$

where  $\alpha$  is the so-called calibration constant and  $\rho(0)$  is the computed charge density at the iron nucleus. Both  $\alpha$  and  $c$  can be obtained from the correlation between experimental  $\delta_{Fe}$  values and the corresponding computed  $\rho(0)$  data in a training set. Then, one can use equation (5) to predict  $\delta_{Fe}$  for a new molecule from its computed  $\rho(0)$ , basically as described in detail elsewhere for a wide variety of heme and other model systems.<sup>2</sup>

The hybrid functional B3LYP<sup>3</sup> with a Wachter's basis (62111111/3311111/3111) for Fe,<sup>4</sup> 6-311G\* for all the other heavy atoms and 6-31G\* for hydrogens in the *Gaussian*

03 program<sup>5</sup> was used to predict Mössbauer quadrupole splittings and isomer shifts, the same approach used in the previous work for various iron-containing proteins and models.<sup>2,6</sup> To calculate  $\Delta E_Q$ , we first evaluated the principal components of the electric field gradient tensor at the <sup>57</sup>Fe nucleus ( $V_{ij}$ ), then we used equation (1) to deduce  $\Delta E_Q$ , using a precise recent determination of  $Q = 0.16 (\pm 5\%) \times 10^{-28} \text{m}^2$ ,<sup>7</sup> a value previously found to permit excellent accord between theory and experiment in a broad range of systems.<sup>2,6</sup> To calculate  $\delta_{\text{Fe}}$  values, we read the Kohn-Sham orbitals from the *Gaussian 03* results into the AIM 2000 program,<sup>8</sup> to evaluate the charge density at the iron nucleus,  $\rho(0)$ . Then, we evaluated the isomer shifts by using the equation derived previously:<sup>2</sup>

$$\delta_{\text{Fe}} = -0.404 [\rho(0) - 11614.16] \quad (6)$$

Charges were calculated using the natural bonding orbital analysis.<sup>9</sup>

In MauG models **1a-1e** and **2a-2e**, the heme group is represented by a porphyrin with original eight  $\beta$  substituents replaced by methyl groups. As shown in Figure 2 in the Text, the amino acids used in the calculations are basically truncated to leave the  $C_\beta$  moiety to be  $\text{CH}_3$  with the exception of Pro107 due to its ring structure. Unless otherwise stated below or in the Text, the geometries of the structural models investigated in this work were optimized (see Tables S1-S11 for the optimized coordinates) with the terminal C atoms and their attached hydrogen atoms fixed at the x-ray crystal structure positions to mimic the protein environment effect. Optimizations were done using the DFT method BPW91<sup>10</sup> with the Wachters' basis for Fe, 6-311G\* for other heavy atoms and 6-31G\* for hydrogens, which is the same approach used previously to investigate other heme protein systems.<sup>6e,6h</sup> Then, the Mössbauer properties of these optimized structures were calculated using above methods. Previous investigations suggest that the residual errors in  $\Delta E_Q$  calculations can be decreased upon using better quality x-ray structures<sup>6a,6b</sup> or properly optimized structures for proteins.<sup>6b,6e,6f</sup> For heme site **1**, calculations done using the partially optimized porphyrin structures (**1c-1e**) only have errors of 0.03-0.15 mm/s and no further improvement was found by using full optimization. For heme site **2**, the porphyrin moiety in **2e** was subjected to full optimization, which has a decreased error of 0.06 mm/s compared to an error of 0.34 mm/s from the partial optimization. For  $\text{Fe}^{\text{IV}}=\text{O}$  and  $\text{Fe}^{\text{IV}}=\text{OH}$  systems such as heme **1** models, the calculated asymmetry parameters are in a range of 0.03 to 0.16, indicating basically an axial symmetry. In contrast, for heme **2e** and **2f** models, the calculated asymmetry parameters are larger. For instance, for the protein based model **2e**, the asymmetry parameter is 0.76, which may help enhance the  $\Delta E_Q$  value by 9% based on equation (1).

In addition, we used Bader's Atoms-in-Molecules (AIM) theory<sup>8b,11</sup> to help analyze the interactions between Gln103/Pro107 and the oxo group for heme site **1**. For convenience, we give here a very brief overview of this approach. According to the AIM theory, every chemical bond has a bond critical point at which the first derivative of the charge density,  $\rho(\mathbf{r})$ , is zero. The  $\rho(\mathbf{r})$  topology is described by a real, symmetric, second-rank Hessian-of- $\rho(\mathbf{r})$  tensor, and the tensor trace is related to the bond interaction energy by a local expression of the virial theorem:

$$\text{Tr}(\text{Hessian}) = \nabla^2 \rho(\mathbf{r}) = [2G(\mathbf{r}) + V(\mathbf{r})] (4m/\hbar^2) \quad (7)$$

where  $\nabla^2 \rho(\mathbf{r})$  is the Laplacian of  $\rho(\mathbf{r})$ ,  $G(\mathbf{r})$  and  $V(\mathbf{r})$  are electronic kinetic and electronic potential energy densities, and  $m$  is the electron mass, respectively. Negative and positive  $\nabla^2 \rho(\mathbf{r})$  values are associated with shared-electron (covalent) interactions and closed-shell

(electrostatic) interactions, respectively. In the latter case, one can further evaluate the total energy density,  $H(\mathbf{r})$ , at the bond critical point:

$$H(\mathbf{r}) = G(\mathbf{r}) + V(\mathbf{r}) \quad (8)$$

A negative  $H(\mathbf{r})$  is termed partial covalence, while a positive  $H(\mathbf{r})$  indicates a purely closed-shell, electrostatic interaction.<sup>8b,11,12</sup> All critical point properties were calculated by using the AIM2000 program<sup>8a</sup> and are shown in Table S8. These results suggest that the interactions between Gln103/Pro107 and the oxo group are similar to some hydrogen bonds in biomolecules.<sup>12</sup>

#### References cited in this supporting information:

- (1) Debrunner, P. G. In *Iron Porphyrins*; Lever, A. B. P., Gray, H. B., Eds.; VCH Publishers: New York, **1989**; Vol.3, pp139-234.
- (2) Zhang, Y.; Mao, J.; Oldfield, E. *J. Am. Chem. Soc.* **2002**, *124*, 7829-7839.
- (3) Becke, A. D. *J. Chem. Phys.* **1993**, *98*, 5648-52.
- (4) Wachters, A. J. *J. Chem. Phys.* **1970**, *52*, 1033-1036.  
<http://www.emsl.pnl.gov/forms/basisform.html>
- (5) Frisch, M. J.; Trucks, G. W.; Schlegel, H. B.; Scuseria, G. E.; Robb, M. A.; Cheeseman, J. R.; Montgomery, Jr., J. A.; Vreven, T.; Kudin, K. N.; Burant, J. C.; Millam, J. M.; Iyengar, S. S.; Tomasi, J.; Barone, V.; Mennucci, B.; Cossi, M.; Scalmani, G.; Rega, N.; Petersson, G. A.; Nakatsuji, H.; Hada, M.; Ehara, M.; Toyota, K.; Fukuda, R.; Hasegawa, J.; Ishida, M.; Nakajima, T.; Honda, Y.; Kitao, O.; Nakai, H.; Klene, M.; Li, X.; Knox, J. E.; Hratchian, H. P.; Cross, J. B.; Bakken, V.; Adamo, C.; Jaramillo, J.; Gomperts, R.; Stratmann, R. E.; Yazyev, O.; Austin, A. J.; Cammi, R.; Pomelli, C.; Ochterski, J. W.; Ayala, P. Y.; Morokuma, K.; Voth, G. A.; Salvador, P.; Dannenberg, J. J.; Zakrzewski, V. G.; Dapprich, S.; Daniels, A. D.; Strain, M. C.; Farkas, O.; Malick, D. K.; Rabuck, A. D.; Raghavachari, K.; Foresman, J. B.; Ortiz, J. V.; Cui, Q.; Baboul, A. G.; Clifford, S.; Cioslowski, J.; Stefanov, B. B.; Liu, G.; Liashenko, A.; Piskorz, P.; Komaromi, I.; Martin, R. L.; Fox, D. J.; Keith, T.; Al-Laham, M. A.; Peng, C. Y.; Nanayakkara, A.; Challacombe, M.; Gill, P. M. W.; Johnson, B.; Chen, W.; Wong, M. W.; Gonzalez, C.; Pople, J. A.; Gaussian 03, Revision D.01; Gaussian, Inc.: Wallingford CT, 2004.
- (6) a) Zhang, Y.; Mao, J.; Godbout, N.; Oldfield, E. *J. Am. Chem. Soc.* **2002**, *124*, 13921-13930. b) Zhang, Y.; Gossman, W.; Oldfield, E. *J. Am. Chem. Soc.* **2003**, *125*, 16387-16396. c) Zhang, Y.; Oldfield, E. *J. Phys. Chem. B.*, **2003**, *107*, 7180-7188. d) Zhang, Y.; Oldfield, E. *J. Phys. Chem. A.*, **2003**, *107*, 4147-4150. e) Zhang, Y.; Oldfield, E. *J. Am. Chem. Soc.* **2004**, *126*, 4470-4471. f) Zhang, Y.; Oldfield, E. *J. Am. Chem. Soc.* **2004**, *126*, 9494-9495. g) Ling, Y.; Zhang, Y. *J. Am. Chem. Soc.* **2009**, *131*, 6386-6388. h) Ling, Y.; Zhang, Y.; *Ann. Rep. Comput. Chem.* **2010**, in press.
- (7) Dufek, P.; Blaha, P.; Schwarz, K. *Phys. Rev. Lett.* **1995**, *75*, 3545-3548.
- (8) (a) AIM2000, Version 1.0, written by Biegler-König F., University of Applied Science, Bielefeld, Germany. (b) Bader, R. F. W. *Atoms in Molecules: A Quantum Theory*; Oxford Univ. Press: Oxford, 1990.
- (9) NBO Version 3.1, Glendening, E. D.; Reed, A. E.; Carpenter, J. E.; Weinhold, F., Theoretical Chemistry Institute, University of Wisconsin, Madison, WI.

- (10) Becke, A. D. *Phys. Rev. A* **1988**, *38*, 3098-3100. Perdew, J. P.; Burke, K.; Wang, Y. *Phys. Rev. B* **1996**, *54*, 16533-16539.
- (11) Bader, R. F. W. *J. Phys. Chem. A* **1998**, *102*, 7314-7323.
- (12) Arnold, W. E.; Oldfield, E. *J. Am. Chem. Soc.* **2000**, *122*, 12835-12841.

**Table S1.** Cartesian coordinates of the MauG-1a model

|    |           |           |           |
|----|-----------|-----------|-----------|
| C  | -2.316459 | -0.581241 | 4.961015  |
| C  | -1.354293 | -0.303212 | 3.818388  |
| N  | 0.019289  | -0.16188  | 3.999758  |
| C  | 0.611429  | -0.011864 | 2.776745  |
| N  | -0.294615 | -0.050825 | 1.810657  |
| C  | -1.514893 | -0.229493 | 2.445621  |
| H  | -1.874751 | -0.283667 | 5.912221  |
| H  | -3.245656 | -0.033078 | 4.804568  |
| H  | 0.503528  | -0.163033 | 4.894156  |
| H  | -2.433539 | -0.301002 | 1.868823  |
| H  | 1.680933  | 0.122129  | 2.635067  |
| H  | -2.52432  | -1.651559 | 4.975303  |
| C  | 2.921817  | 2.034016  | -0.371202 |
| C  | 1.68107   | 2.684562  | -0.261549 |
| C  | 1.476586  | 4.136201  | -0.161218 |
| C  | 2.507628  | 5.239405  | -0.094542 |
| C  | 0.119323  | 4.353517  | -0.12857  |
| C  | -0.569173 | 5.711233  | 0.005143  |
| C  | -0.504839 | 3.034821  | -0.24291  |
| N  | 0.456599  | 2.046145  | -0.271501 |
| C  | -1.870353 | 2.812915  | -0.428991 |
| C  | -2.486258 | 1.58791   | -0.689714 |
| C  | -3.890821 | 1.429429  | -1.04559  |
| C  | -4.906504 | 2.546384  | -1.136501 |
| C  | -4.103795 | 0.079963  | -1.234431 |
| C  | -5.398507 | -0.602966 | -1.651062 |
| C  | -2.819019 | -0.572376 | -0.981791 |
| N  | -1.859467 | 0.36378   | -0.658716 |
| C  | -2.597818 | -1.949959 | -0.99513  |
| C  | -1.39455  | -2.600497 | -0.714837 |
| C  | -1.243435 | -4.053925 | -0.65557  |
| C  | -2.42203  | -5.009641 | -0.856949 |
| C  | 0.086303  | -4.290058 | -0.333107 |
| C  | 0.85222   | -5.593027 | -0.080677 |
| C  | 0.724393  | -2.966382 | -0.260581 |
| N  | -0.20288  | -1.968644 | -0.451782 |
| C  | 2.100957  | -2.747248 | -0.14174  |
| C  | 2.768495  | -1.52104  | -0.21584  |
| C  | 4.217132  | -1.384053 | -0.375744 |
| C  | 5.228607  | -2.548392 | -0.407222 |
| C  | 4.458193  | -0.022487 | -0.532358 |
| C  | 5.81111   | 0.642377  | -0.836261 |
| C  | 3.151972  | 0.648291  | -0.394836 |
| N  | 2.151115  | -0.288925 | -0.220643 |
| Fe | 0.131866  | 0.037034  | -0.481459 |
| H  | 3.799149  | 2.683573  | -0.442922 |
| H  | -2.518054 | 3.693207  | -0.444141 |
| H  | -3.451952 | -2.587591 | -1.233374 |
| H  | 2.74315   | -3.628716 | -0.079715 |
| H  | -1.64719  | 5.54953   | -0.015394 |
| H  | -0.288747 | 6.170072  | 0.95296   |
| H  | -0.285183 | 6.369644  | -0.816063 |
| H  | 1.993633  | 6.192228  | 0.032472  |
| H  | 3.170997  | 5.069592  | 0.753315  |

|   |           |           |           |
|---|-----------|-----------|-----------|
| H | -5.840492 | 2.13739   | -1.522295 |
| H | -5.068665 | 2.937665  | -0.132095 |
| H | -4.564673 | 3.350576  | -1.78871  |
| H | -5.262042 | -1.683743 | -1.622771 |
| H | -2.051852 | -6.034679 | -0.845173 |
| H | -3.115179 | -4.864245 | -0.028258 |
| H | -2.936661 | -4.820344 | -1.799165 |
| H | 1.868881  | -5.328822 | 0.210368  |
| H | 6.205804  | -2.09792  | -0.581449 |
| H | 5.241362  | -3.087509 | 0.5403    |
| H | 4.997787  | -3.241299 | -1.216826 |
| H | 5.720925  | 1.725138  | -0.924513 |
| H | 6.495305  | 0.39959   | -0.022626 |
| O | 0.34049   | 0.078624  | -2.120546 |
| H | 3.092201  | 5.26101   | -1.014486 |
| H | -6.210775 | -0.321567 | -0.981608 |
| H | -5.641919 | -0.294442 | -2.667267 |
| H | 0.382417  | -6.166248 | 0.718573  |
| H | 0.878721  | -6.193289 | -0.990003 |
| H | 6.197214  | 0.233001  | -1.769302 |

**Table S2.** Cartesian coordinates of the MauG-1b model

|    |               |               |               |
|----|---------------|---------------|---------------|
| C  | -2.316459     | -0.58124      | 4.961015      |
| C  | -1.3578945845 | -0.3062868083 | 3.8032503416  |
| N  | 0.0092866084  | -0.1010929396 | 3.9741446147  |
| C  | 0.6036477423  | 0.0460082394  | 2.7585162543  |
| N  | -0.3033567304 | -0.0547307875 | 1.7894781279  |
| C  | -1.5226678754 | -0.2723895752 | 2.4275396346  |
| H  | -1.874751     | -0.283666     | 5.912221      |
| H  | -3.245656     | -0.033076     | 4.804568      |
| H  | 0.4936222495  | -0.057809474  | 4.8686840389  |
| H  | -2.4379739823 | -0.396545614  | 1.8565929531  |
| H  | 1.6661070959  | 0.2237548816  | 2.6187684969  |
| H  | -2.524321     | -1.651557     | 4.975303      |
| C  | 2.9153782059  | 2.0374442242  | -0.3482309816 |
| C  | 1.6770662301  | 2.6819592893  | -0.2214601788 |
| C  | 1.4755637273  | 4.1335581988  | -0.1473201707 |
| C  | 2.507631      | 5.239403      | -0.094542     |
| C  | 0.1154884574  | 4.3532570469  | -0.1118246665 |
| C  | -0.56917      | 5.711233      | 0.005143      |
| C  | -0.5142833958 | 3.0385280315  | -0.1984970767 |
| N  | 0.444097219   | 2.0408089701  | -0.2053696949 |
| C  | -1.8784159262 | 2.8206494258  | -0.3918714396 |
| C  | -2.4889070106 | 1.597337954   | -0.6593443195 |
| C  | -3.884211147  | 1.4339177723  | -1.0332995035 |
| C  | -4.906502     | 2.546387      | -1.136501     |
| C  | -4.0978235412 | 0.0746117768  | -1.2275840631 |
| C  | -5.398507     | -0.602963     | -1.651062     |
| C  | -2.8249959906 | -0.5789710137 | -0.9592588361 |
| N  | -1.8523512033 | 0.3660932246  | -0.622085216  |
| C  | -2.6055145412 | -1.9522469884 | -0.9672889355 |
| C  | -1.4039438644 | -2.6006520312 | -0.6755073226 |
| C  | -1.247892515  | -4.0517340318 | -0.6411646593 |
| C  | -2.422033     | -5.00964      | -0.856949     |
| C  | 0.084769652   | -4.2895862333 | -0.3176098038 |
| C  | 0.852217      | -5.593028     | -0.080677     |
| C  | 0.7196342049  | -2.9673115087 | -0.2180341976 |
| N  | -0.2156238985 | -1.9649845125 | -0.3892266088 |
| C  | 2.0957958423  | -2.7542460831 | -0.1145215149 |
| C  | 2.7638784186  | -1.5294238899 | -0.2030536203 |
| C  | 4.2056047339  | -1.3893937444 | -0.3728561615 |
| C  | 5.228605      | -2.548395     | -0.407222     |
| C  | 4.4486242473  | -0.0167266848 | -0.5314895789 |
| C  | 5.81111       | 0.642373      | -0.836261     |
| C  | 3.1471455974  | 0.6524233886  | -0.3837284645 |
| N  | 2.1337981104  | -0.2897991911 | -0.211793411  |
| Fe | 0.0966324162  | 0.044028647   | -0.3737773889 |
| H  | 3.789717173   | 2.6883474126  | -0.4282067555 |
| H  | -2.5237507064 | 3.7010137452  | -0.4176056259 |
| H  | -3.4547036132 | -2.5897514873 | -1.218625269  |
| H  | 2.7357801236  | -3.6360994644 | -0.0556681813 |
| H  | -1.647187     | 5.549531      | -0.015394     |
| H  | -0.288743     | 6.170072      | 0.95296       |
| H  | -0.285179     | 6.369644      | -0.816063     |
| H  | 1.993637      | 6.192227      | 0.032472      |
| H  | 3.171         | 5.06959       | 0.753315      |

|   |              |               |               |
|---|--------------|---------------|---------------|
| H | -5.840491    | 2.137394      | -1.522295     |
| H | -5.068663    | 2.937668      | -0.132095     |
| H | -4.564671    | 3.350579      | -1.78871      |
| H | -5.262043    | -1.68374      | -1.622771     |
| H | -2.051856    | -6.034678     | -0.845173     |
| H | -3.115182    | -4.864243     | -0.028258     |
| H | -2.936664    | -4.820342     | -1.799165     |
| H | 1.868878     | -5.328823     | 0.210368      |
| H | 6.205803     | -2.097924     | -0.581449     |
| H | 5.24136      | -3.087512     | 0.5403        |
| H | 4.997785     | -3.241302     | -1.216826     |
| H | 5.720926     | 1.725134      | -0.924513     |
| H | 6.495305     | 0.399586      | -0.022626     |
| O | 0.2839497802 | 0.0851306234  | -2.1604869467 |
| H | 3.092204     | 5.261008      | -1.014486     |
| H | -6.210775    | -0.321563     | -0.981608     |
| H | -5.641919    | -0.294439     | -2.667267     |
| H | 0.382413     | -6.166248     | 0.718573      |
| H | 0.878717     | -6.19329      | -0.990003     |
| H | 6.197214     | 0.232997      | -1.769302     |
| H | 1.1794837053 | -0.2454738358 | -2.3887570402 |

**Table S3.** Cartesian coordinates of the MauG-1c model

|    |               |               |               |
|----|---------------|---------------|---------------|
| C  | 2.538426388   | -2.3725491284 | 4.8366366637  |
| C  | 2.0188860874  | -1.3823245033 | 3.8092819014  |
| N  | 2.1972276635  | -0.006263504  | 3.9327237757  |
| C  | 1.7271939128  | 0.6015634896  | 2.8025330357  |
| N  | 1.2585769266  | -0.2974850048 | 1.9492354601  |
| C  | 1.4331483212  | -1.5289746921 | 2.5643047482  |
| H  | 2.5900340487  | -1.9090113947 | 5.8219885901  |
| H  | 1.8882163286  | -3.2464654219 | 4.8797897719  |
| H  | 2.6025182177  | 0.4706604491  | 4.7344330799  |
| H  | 1.130259528   | -2.4458060553 | 2.0654837794  |
| H  | 1.7432807479  | 1.6766318707  | 2.6418748765  |
| H  | 3.5377459231  | -2.6785157269 | 4.5256143054  |
| C  | -1.1162132584 | 3.1052633688  | 0.4488044575  |
| C  | -1.8039347097 | 1.929968399   | 0.7973215198  |
| C  | -3.1694843994 | 1.8590620233  | 1.3333782944  |
| C  | -4.1053831658 | 2.9890149218  | 1.7023404829  |
| C  | -3.4845977201 | 0.5267573029  | 1.4699567841  |
| C  | -4.7955881542 | -0.0313671173 | 2.0188344196  |
| C  | -2.3195379367 | -0.2175306265 | 0.9908056713  |
| N  | -1.3062518653 | 0.650875267   | 0.6374924043  |
| C  | -2.2888313623 | -1.5968316503 | 0.7747161068  |
| C  | -1.2684926337 | -2.323206903  | 0.1589360498  |
| C  | -1.3603222208 | -3.7315139865 | -0.2092077866 |
| C  | -2.5384225513 | -4.638112016  | 0.0655881783  |
| C  | -0.1605092188 | -4.0670494534 | -0.8020019497 |
| C  | 0.2406513441  | -5.4170859321 | -1.381890292  |
| C  | 0.6535752601  | -2.8520862279 | -0.789166134  |
| N  | -0.0414537229 | -1.8139489405 | -0.2049606557 |
| C  | 1.9696701533  | -2.7569562652 | -1.2418108587 |
| C  | 2.7760002337  | -1.6180361431 | -1.211947681  |
| C  | 4.1848202946  | -1.6025315247 | -1.6038269711 |
| C  | 4.9238779615  | -2.8638905479 | -2.0582007093 |
| C  | 4.6264801287  | -0.301315913  | -1.4032599285 |
| C  | 6.0080468102  | 0.3392977222  | -1.5809022559 |
| C  | 3.4507827914  | 0.4569756215  | -0.9482417039 |
| N  | 2.3620056699  | -0.3723271485 | -0.8032454855 |
| C  | 3.4055287835  | 1.84683994    | -0.8000993627 |
| C  | 2.2811915604  | 2.6242524208  | -0.5079357449 |
| C  | 2.2309766398  | 4.0794407767  | -0.6503556486 |
| C  | 3.4144101863  | 4.9796572676  | -1.0619549051 |
| C  | 0.9146292647  | 4.4457229155  | -0.3839222334 |
| C  | 0.3125446087  | 5.8563247281  | -0.5013515677 |
| C  | 0.2068017701  | 3.207017303   | -0.0126025439 |
| N  | 1.0587895858  | 2.1220834839  | -0.1149312369 |
| Fe | 0.4814672773  | 0.1406704538  | -0.2005996057 |
| H  | -1.6757129553 | 4.0390248775  | 0.5584509559  |
| H  | -3.1993576486 | -2.1502863656 | 1.0097128181  |
| H  | 2.4230218996  | -3.6651603296 | -1.6447312602 |
| H  | 4.3177274463  | 2.4033726733  | -1.0259868267 |
| H  | -4.7449199443 | -1.1196267277 | 1.9762227666  |
| H  | -4.9120986105 | 0.286500787   | 3.0546501894  |
| H  | -5.6475031966 | 0.3155339281  | 1.4336563056  |
| H  | -5.0141253989 | 2.5647997746  | 2.1294506123  |
| H  | -3.6234134087 | 3.6304682773  | 2.4399031894  |

|   |               |               |               |
|---|---------------|---------------|---------------|
| H | -2.3536598228 | -5.604366535  | -0.4041574323 |
| H | -2.6129274078 | -4.7674019324 | 1.1453859111  |
| H | -3.4709827868 | -4.2208137477 | -0.3153876247 |
| H | 1.2848952265  | -5.3812259829 | -1.6913588336 |
| H | 5.9310738936  | -2.5901026682 | -2.3719992933 |
| H | 4.9805490032  | -3.5439220206 | -1.2080997805 |
| H | 4.4075549492  | -3.3550684481 | -2.8831884773 |
| H | 5.9384627767  | 1.3748627946  | -1.2479262159 |
| H | 3.0211377829  | 5.9949967019  | -1.1130983293 |
| H | 4.218865168   | 4.9387528722  | -0.3272522354 |
| H | 3.7996891574  | 4.6889946128  | -2.0396728274 |
| H | -0.7479845841 | 5.86696803    | -0.2494437446 |
| H | 0.8548888641  | 6.5119051993  | 0.1806652608  |
| O | -0.0998563087 | 0.3412526633  | -1.7401526015 |
| H | -4.3580612369 | 3.5767370074  | 0.8196018226  |
| H | 0.1087129243  | -6.2025194964 | -0.6383720546 |
| H | -0.3872547299 | -5.6268915754 | -2.2472373636 |
| H | 6.7559511912  | -0.1846577113 | -0.985747872  |
| H | 6.29772001    | 0.3138132853  | -2.6312978865 |
| H | 0.4462021215  | 6.2066403075  | -1.5244076092 |
| C | -6.9074246018 | 0.144698793   | -2.0776128965 |
| C | -5.5396300252 | 0.8298572512  | -1.9576617857 |
| C | -4.3910229539 | -0.1891790745 | -1.8639535933 |
| O | -4.5719732224 | -1.328605814  | -1.4306450642 |
| N | -3.1825751406 | 0.2692508264  | -2.308886178  |
| H | -7.6989056426 | 0.8908940862  | -2.1507179345 |
| H | -6.8995842713 | -0.4653172094 | -2.9809096395 |
| H | -5.3722171045 | 1.5127362684  | -2.8106574209 |
| H | -5.4959645338 | 1.4582231226  | -1.0479794409 |
| H | -2.3222730641 | -0.2363705317 | -2.08300883   |
| H | -3.0513439142 | 1.2603824778  | -2.4937367958 |
| H | -7.0871379012 | -0.4919847111 | -1.2108267374 |

**Table S4.** Cartesian coordinates of the MauG-1d model

|    |               |               |               |
|----|---------------|---------------|---------------|
| C  | 2.538426388   | -2.3725491284 | 4.8366366637  |
| C  | 2.0160448847  | -1.384493585  | 3.8069866164  |
| N  | 2.1940280464  | -0.0079374713 | 3.9259702727  |
| C  | 1.7199085638  | 0.596917632   | 2.7959007137  |
| N  | 1.2495591055  | -0.3043197943 | 1.9460003126  |
| C  | 1.4260857132  | -1.5343781655 | 2.563904595   |
| H  | 2.5900340487  | -1.9090113947 | 5.8219885901  |
| H  | 1.8882163286  | -3.2464654219 | 4.8797897719  |
| H  | 2.6008621023  | 0.4714730993  | 4.7254081698  |
| H  | 1.1221900269  | -2.4518528161 | 2.0668459643  |
| H  | 1.7345388632  | 1.6714585802  | 2.6318234461  |
| H  | 3.5377459231  | -2.6785157269 | 4.5256143054  |
| C  | -1.1182131882 | 3.1050401627  | 0.4447246767  |
| C  | -1.8094178331 | 1.9298879125  | 0.7835894897  |
| C  | -3.1720983084 | 1.8597325739  | 1.3274462216  |
| C  | -4.1053831658 | 2.9890149218  | 1.7023404829  |
| C  | -3.4889869222 | 0.5279590595  | 1.4596431194  |
| C  | -4.7955881542 | -0.0313671173 | 2.0188344196  |
| C  | -2.3308159595 | -0.216728753  | 0.9652443917  |
| N  | -1.316607211  | 0.6505074207  | 0.6123014977  |
| C  | -2.2999661324 | -1.5954736    | 0.7523805582  |
| C  | -1.2760278307 | -2.321976719  | 0.1444667833  |
| C  | -1.361976215  | -3.732191653  | -0.2124004891 |
| C  | -2.5384225513 | -4.638112016  | 0.0655881783  |
| C  | -0.1611258922 | -4.0675843311 | -0.8018787571 |
| C  | 0.2406513441  | -5.4170859321 | -1.381890292  |
| C  | 0.6509901445  | -2.8512724654 | -0.7929464937 |
| N  | -0.0493226744 | -1.8108699996 | -0.2167059192 |
| C  | 1.9690754623  | -2.7574269858 | -1.2388993113 |
| C  | 2.7777899751  | -1.6194844024 | -1.2060301695 |
| C  | 4.1851432396  | -1.6030554769 | -1.6015982191 |
| C  | 4.9238779615  | -2.8638905479 | -2.0582007093 |
| C  | 4.6270887916  | -0.3015325706 | -1.401001494  |
| C  | 6.0080468102  | 0.3392977222  | -1.5809022559 |
| C  | 3.4532625382  | 0.4560604196  | -0.9419832882 |
| N  | 2.3655617107  | -0.374524066  | -0.7937754629 |
| C  | 3.4067606784  | 1.8463258295  | -0.7948576334 |
| C  | 2.2822145935  | 2.623918865   | -0.5042036184 |
| C  | 2.2313520927  | 4.0788674225  | -0.6490465564 |
| C  | 3.4144101863  | 4.9796572676  | -1.0619549051 |
| C  | 0.9146510239  | 4.445243556   | -0.3834829399 |
| C  | 0.3125446087  | 5.8563247281  | -0.5013515677 |
| C  | 0.2065334661  | 3.2066820232  | -0.0120547691 |
| N  | 1.0593516325  | 2.1220640812  | -0.1108556816 |
| Fe | 0.4799857291  | 0.1401153041  | -0.2073400859 |
| H  | -1.6766659094 | 4.0391187657  | 0.5551431112  |
| H  | -3.2040038374 | -2.1547899542 | 1.0014378943  |
| H  | 2.4220985757  | -3.6662090317 | -1.6411310873 |
| H  | 4.318485643   | 2.4034715056  | -1.021143028  |
| H  | -4.7449199443 | -1.1196267277 | 1.9762227666  |
| H  | -4.9120986105 | 0.286500787   | 3.0546501894  |
| H  | -5.6475031966 | 0.3155339281  | 1.4336563056  |
| H  | -5.0141253989 | 2.5647997746  | 2.1294506123  |
| H  | -3.6234134087 | 3.6304682773  | 2.4399031894  |

|   |               |               |               |
|---|---------------|---------------|---------------|
| H | -2.3536598228 | -5.604366535  | -0.4041574323 |
| H | -2.6129274078 | -4.7674019324 | 1.1453859111  |
| H | -3.4709827868 | -4.2208137477 | -0.3153876247 |
| H | 1.2848952265  | -5.3812259829 | -1.6913588336 |
| H | 5.9310738936  | -2.5901026682 | -2.3719992933 |
| H | 4.9805490032  | -3.5439220206 | -1.2080997805 |
| H | 4.4075549492  | -3.3550684481 | -2.8831884773 |
| H | 5.9384627767  | 1.3748627946  | -1.2479262159 |
| H | 3.0211377829  | 5.9949967019  | -1.1130983293 |
| H | 4.218865168   | 4.9387528722  | -0.3272522354 |
| H | 3.7996891574  | 4.6889946128  | -2.0396728274 |
| H | -0.7479845841 | 5.86696803    | -0.2494437446 |
| H | 0.8548888641  | 6.5119051993  | 0.1806652608  |
| O | -0.0672636472 | 0.3471686725  | -1.7585333408 |
| H | -4.3580612369 | 3.5767370074  | 0.8196018226  |
| H | 0.1087129243  | -6.2025194964 | -0.6383720546 |
| H | -0.3872547299 | -5.6268915754 | -2.2472373636 |
| H | 6.7559511912  | -0.1846577113 | -0.985747872  |
| H | 6.29772001    | 0.3138132853  | -2.6312978865 |
| H | 0.4462021215  | 6.2066403075  | -1.5244076092 |
| C | -5.0379107714 | -2.6129675581 | -4.9632909281 |
| C | -4.332639213  | -1.2862522656 | -4.6698447906 |
| C | -3.4482926111 | -1.3619178063 | -3.4103481929 |
| O | -3.7655825148 | -2.0586557229 | -2.4442850858 |
| N | -2.3268707182 | -0.5900714724 | -3.4553122228 |
| H | -5.7624889141 | -2.5038832744 | -5.7871034761 |
| H | -4.313067724  | -3.394583668  | -5.2452455865 |
| H | -3.7456852962 | -0.9528536031 | -5.5449129882 |
| H | -5.0868612994 | -0.4980251821 | -4.4840067933 |
| H | -1.6924805314 | -0.4882273558 | -2.6528393797 |
| H | -2.1220245208 | -0.0140641308 | -4.2660324635 |
| H | -5.5704949979 | -2.9609941304 | -4.0651926269 |

**Table S5.** Cartesian coordinates of the MauG-1e model

|    |               |               |                |
|----|---------------|---------------|----------------|
| C  | 21.842        | 25.377        | -86.278        |
| C  | 22.7478382039 | 26.2570858317 | -85.4360237554 |
| N  | 23.1944113984 | 25.8866047593 | -84.1698848352 |
| C  | 24.0780834963 | 26.8263599397 | -83.7211198384 |
| N  | 24.2364050874 | 27.7844746614 | -84.623658782  |
| C  | 23.4148290285 | 27.442323985  | -85.6882652938 |
| H  | 21.244        | 24.726        | -85.64         |
| H  | 21.182        | 25.991        | -86.891        |
| H  | 22.9062630262 | 25.0563115178 | -83.6578318953 |
| H  | 23.3634175785 | 28.070750644  | -86.5731726088 |
| H  | 24.5748135602 | 26.7797626826 | -82.7554083095 |
| H  | 22.477        | 24.77         | -86.924        |
| C  | 25.4241905713 | 30.1490377918 | -81.106131503  |
| C  | 24.3959670603 | 30.6577272485 | -81.9194777228 |
| C  | 23.2803282214 | 31.4980330154 | -81.4681249945 |
| C  | 22.923        | 31.928        | -80.063        |
| C  | 22.5529558204 | 31.8424729934 | -82.5841303609 |
| C  | 21.278        | 32.681        | -82.598        |
| C  | 23.2428754913 | 31.2378403722 | -83.7230631047 |
| N  | 24.3180849044 | 30.4882356403 | -83.2888039306 |
| C  | 22.9557930372 | 31.5095860048 | -85.062447126  |
| C  | 23.694458919  | 31.1037885504 | -86.1751069447 |
| C  | 23.4571708694 | 31.5596278046 | -87.5401915455 |
| C  | 22.345        | 32.485        | -87.979        |
| C  | 24.4018067344 | 30.944084837  | -88.3371495364 |
| C  | 24.6          | 31.115        | -89.84         |
| C  | 25.2035754237 | 30.1093319274 | -87.4426733066 |
| N  | 24.760847596  | 30.2320628157 | -86.1412086591 |
| C  | 26.2402604013 | 29.2643020782 | -87.8403085625 |
| C  | 27.018960725  | 28.4586340473 | -87.008171577  |
| C  | 28.0465975195 | 27.5382892247 | -87.4938133388 |
| C  | 28.342        | 27.35         | -88.985        |
| C  | 28.5624788917 | 26.9109702254 | -86.3675715359 |
| C  | 29.613        | 25.807        | -86.216        |
| C  | 27.8769444735 | 27.518443277  | -85.2160794699 |
| N  | 26.924913319  | 28.4194497261 | -85.6358610651 |
| C  | 28.2220787192 | 27.3062384453 | -83.8771506953 |
| C  | 27.6989866664 | 27.9619535552 | -82.7587095561 |
| C  | 28.3035336626 | 27.9197741077 | -81.4263100833 |
| C  | 29.534        | 27.079        | -81.029        |
| C  | 27.5679802226 | 28.803678631  | -80.6419889473 |
| C  | 27.86         | 29.199        | -79.183        |
| C  | 26.4794485211 | 29.3096345392 | -81.4993838498 |
| N  | 26.5964240593 | 28.7894956026 | -82.7759240925 |
| Fe | 25.6900838367 | 29.5473704943 | -84.4698065214 |
| H  | 25.3910096393 | 30.4406714946 | -80.0521715478 |
| H  | 22.1270935735 | 32.1925944414 | -85.258178808  |
| H  | 26.4637561023 | 29.2203830739 | -88.9084370203 |
| H  | 29.0551608619 | 26.628781308  | -83.6779067735 |
| H  | 20.958        | 32.795        | -83.634        |
| H  | 20.506        | 32.157        | -82.035        |
| H  | 21.444        | 33.665        | -82.159        |
| H  | 21.986        | 32.484        | -80.096        |
| H  | 22.797        | 31.042        | -79.441        |

|   |               |               |                |
|---|---------------|---------------|----------------|
| H | 22.474        | 32.714        | -89.037        |
| H | 21.403        | 31.956        | -87.834        |
| H | 22.333        | 33.412        | -87.405        |
| H | 25.375        | 30.429        | -90.181        |
| H | 29.185        | 26.668        | -89.095        |
| H | 27.456        | 26.909        | -89.442        |
| H | 28.573        | 28.295        | -89.477        |
| H | 29.674        | 25.552        | -85.158        |
| H | 29.734        | 27.307        | -79.982        |
| H | 29.332        | 26.013        | -81.136        |
| H | 30.402        | 27.347        | -81.632        |
| H | 27.139        | 29.925        | -78.807        |
| H | 27.813        | 28.293        | -78.578        |
| O | 26.7035486714 | 30.8617723399 | -84.4200679076 |
| H | 23.706        | 32.559        | -79.642        |
| H | 23.669        | 30.901        | -90.364        |
| H | 24.906        | 32.14         | -90.047        |
| H | 29.326        | 24.924        | -86.787        |
| H | 30.584        | 26.162        | -86.561        |
| H | 28.863        | 29.621        | -79.127        |
| C | 23.559        | 36.687        | -82.742        |
| C | 24.3852024153 | 35.4367075052 | -82.4140030219 |
| C | 24.6663217813 | 34.5394606381 | -83.6280643275 |
| O | 24.0348517696 | 34.6354778188 | -84.6803473753 |
| N | 25.6903283362 | 33.6478927232 | -83.4363834781 |
| H | 23.486        | 37.286        | -81.834        |
| H | 24.07         | 37.261        | -83.515        |
| H | 25.3453926694 | 35.728620202  | -81.9490373463 |
| H | 23.8634366549 | 34.8177137053 | -81.6594221193 |
| H | 25.79484427   | 32.8386922893 | -84.0570426159 |
| H | 26.0602744511 | 33.5068735084 | -82.4993248402 |
| H | 22.558        | 36.425        | -83.086        |
| C | 29.994        | 35.325        | -86.646        |
| O | 31.194        | 35.239        | -86.94         |
| N | 29.0937794646 | 34.3328277497 | -86.8586164886 |
| C | 29.5246358036 | 33.0333063903 | -87.4214888576 |
| C | 28.1724106002 | 32.350651129  | -87.7508950658 |
| C | 27.1762111032 | 32.9799129044 | -86.764581164  |
| C | 27.637853646  | 34.4342547688 | -86.6473940381 |
| C | 30.313        | 33.19         | -88.716        |
| O | 31.295        | 32.519        | -89.084        |
| H | 30.1204889323 | 32.462298338  | -86.6901495051 |
| H | 27.8835686648 | 32.5844398971 | -88.7937261031 |
| H | 28.2419749212 | 31.2588139727 | -87.6560090031 |
| H | 26.1316488823 | 32.9019698989 | -87.0988703304 |
| H | 27.2563611952 | 32.4629578248 | -85.7962440314 |
| H | 27.4113851849 | 34.8703647253 | -85.6620011567 |
| H | 27.1767249207 | 35.0729379766 | -87.4250419745 |
| H | 29.616        | 36.276        | -86.302        |
| H | 29.873        | 33.905        | -89.396        |

**Table S6.** Cartesian coordinates of the MauG-2a model

|    |             |             |             |
|----|-------------|-------------|-------------|
| C  | 2.93012400  | 1.95718600  | -0.45413900 |
| C  | 1.70551300  | 2.63004100  | -0.40915500 |
| C  | 1.56469000  | 4.07982600  | -0.35545000 |
| C  | 2.72492600  | 5.05104300  | -0.37445100 |
| C  | 0.21190600  | 4.34132400  | -0.25680500 |
| C  | -0.48293700 | 5.69004300  | -0.16888600 |
| C  | -0.45352300 | 3.04262400  | -0.29866000 |
| N  | 0.47023500  | 2.02647200  | -0.36993000 |
| C  | -1.83720900 | 2.85939400  | -0.32446600 |
| C  | -2.51443900 | 1.65092100  | -0.47253200 |
| C  | -3.96233000 | 1.53376700  | -0.59216000 |
| C  | -4.91872000 | 2.69743700  | -0.54910900 |
| C  | -4.25395700 | 0.19421700  | -0.73060300 |
| C  | -5.57689200 | -0.42023500 | -1.17551300 |
| C  | -2.94709400 | -0.49371700 | -0.72432100 |
| N  | -1.92434900 | 0.41445400  | -0.55379100 |
| C  | -2.73368000 | -1.87033900 | -0.84412100 |
| C  | -1.50408500 | -2.53086900 | -0.71842100 |
| C  | -1.34629400 | -3.98288000 | -0.74251700 |
| C  | -2.47814200 | -4.90826900 | -1.09463000 |
| C  | -0.03749700 | -4.25946700 | -0.39325000 |
| C  | 0.72419900  | -5.58295200 | -0.41578900 |
| C  | 0.60620100  | -2.95162000 | -0.26863300 |
| N  | -0.29771900 | -1.93308400 | -0.46266800 |
| C  | 1.97432600  | -2.77396700 | -0.09722800 |
| C  | 2.66021100  | -1.56250900 | -0.18098300 |
| C  | 4.10888100  | -1.45925800 | -0.21567600 |
| C  | 5.03154100  | -2.66257900 | -0.14793500 |
| C  | 4.40763800  | -0.11322100 | -0.35956300 |
| C  | 5.76949500  | 0.53215600  | -0.62151100 |
| C  | 3.11465400  | 0.57657100  | -0.39518300 |
| N  | 2.07761000  | -0.32603800 | -0.29727600 |
| Fe | 0.08955800  | 0.04744000  | -0.53285800 |
| H  | 3.83098300  | 2.57217000  | -0.50376100 |
| H  | -2.45855900 | 3.75579300  | -0.26822300 |
| H  | -3.61406800 | -2.49948400 | -1.00188400 |
| H  | 2.57940000  | -3.67348700 | 0.04013600  |
| H  | -1.55945000 | 5.54874200  | -0.07255300 |
| H  | -0.11200300 | 6.24949500  | 0.68975000  |
| H  | -0.26983800 | 6.24374200  | -1.08369000 |
| H  | 3.58963600  | 4.56840100  | -0.82897900 |

|   |             |             |             |
|---|-------------|-------------|-------------|
| H | 2.46318900  | 5.93456400  | -0.95593900 |
| H | -5.91830500 | 2.34698100  | -0.80719700 |
| H | -4.91819500 | 3.07119800  | 0.47497900  |
| H | -4.62790800 | 3.49800500  | -1.22834200 |
| H | -6.09562800 | -1.15307200 | -0.57552600 |
| H | -2.09603700 | -5.92830100 | -1.14001300 |
| H | -3.21977600 | -4.83330500 | -0.29875000 |
| H | -2.94096600 | -4.65110200 | -2.04747900 |
| H | 1.27170900  | -5.89283400 | 0.46131400  |
| H | 6.04879100  | -2.28861600 | -0.26763000 |
| H | 4.93520700  | -3.15011900 | 0.82177600  |
| H | 4.81268600  | -3.38036000 | -0.93798000 |
| H | 5.72055000  | 1.62108900  | -0.59561600 |
| H | 6.52160800  | 0.23148900  | 0.10713700  |
| H | 2.96034900  | 5.35056000  | 0.64650000  |
| H | -5.19988800 | -1.12746000 | -1.91376900 |
| H | -6.27803700 | 0.35065700  | -1.49415100 |
| H | 1.55894200  | -5.38953600 | -1.08934700 |
| H | 0.04356400  | -6.37816000 | -0.71910600 |
| H | 6.07873900  | 0.13505800  | -1.58807200 |
| O | 0.21260400  | 0.05977700  | -2.18934700 |
| C | -1.93895700 | -0.69007800 | 4.74126800  |
| C | -1.01707600 | -0.44237100 | 3.59642700  |
| N | 0.31587400  | -0.07359300 | 3.75091200  |
| C | 0.84373100  | 0.15278300  | 2.51252400  |
| N | -0.07767700 | -0.05037500 | 1.58367000  |
| C | -1.23138500 | -0.42067300 | 2.24368300  |
| H | -2.96079800 | -0.79287300 | 4.37697700  |
| H | -1.83859400 | 0.16049900  | 5.41559400  |
| H | 0.81586300  | 0.01259700  | 4.63208000  |
| H | -2.14645000 | -0.64422200 | 1.70480300  |
| H | 1.87344500  | 0.44838200  | 2.33194300  |
| H | -1.69021700 | -1.61896300 | 5.25440200  |

**Table S7.** Cartesian coordinates of the MauG-2b model

|    |             |             |             |
|----|-------------|-------------|-------------|
| C  | 2.89758300  | 2.01684300  | -0.43598900 |
| C  | 1.66187800  | 2.66203000  | -0.39511200 |
| C  | 1.49010900  | 4.10216200  | -0.35238400 |
| C  | 2.62764400  | 5.10369300  | -0.37940200 |
| C  | 0.12193700  | 4.33991200  | -0.25441700 |
| C  | -0.59197100 | 5.68105100  | -0.17518200 |
| C  | -0.52063200 | 3.03668000  | -0.28385600 |
| N  | 0.42776900  | 2.02338200  | -0.35456200 |
| C  | -1.89787200 | 2.82967600  | -0.30499500 |
| C  | -2.54790100 | 1.60752600  | -0.44717100 |
| C  | -3.98991900 | 1.45988100  | -0.58733500 |
| C  | -4.96928500 | 2.60341800  | -0.55428800 |
| C  | -4.25561600 | 0.11226900  | -0.72898500 |
| C  | -5.56721400 | -0.52680900 | -1.17847600 |
| C  | -2.93785800 | -0.55066900 | -0.70323200 |
| N  | -1.92959500 | 0.38061600  | -0.51251600 |
| C  | -2.69960300 | -1.91850300 | -0.83742800 |
| C  | -1.45718500 | -2.55389100 | -0.72124300 |
| C  | -1.27100400 | -3.99729800 | -0.74532800 |
| C  | -2.38276500 | -4.95436800 | -1.09332600 |
| C  | 0.05239800  | -4.25042800 | -0.39531000 |
| C  | 0.83176600  | -5.56683400 | -0.41311600 |
| C  | 0.67261500  | -2.93845400 | -0.26826500 |
| N  | -0.25036300 | -1.92470200 | -0.47934300 |
| C  | 2.03415400  | -2.73707000 | -0.07989400 |
| C  | 2.69095600  | -1.51183700 | -0.15087500 |
| C  | 4.13424100  | -1.37994600 | -0.20718200 |
| C  | 5.08208400  | -2.56397600 | -0.14635700 |
| C  | 4.40816300  | -0.02485400 | -0.35454600 |
| C  | 5.75860700  | 0.64399600  | -0.62218600 |
| C  | 3.10564100  | 0.64193300  | -0.36888200 |
| N  | 2.07956600  | -0.27972700 | -0.25055100 |
| Fe | 0.08993200  | 0.06405300  | -0.46000500 |
| H  | 3.78472300  | 2.64855600  | -0.49586800 |
| H  | -2.53580500 | 3.71358000  | -0.25669500 |
| H  | -3.56578800 | -2.56377900 | -1.00148900 |
| H  | 2.65630600  | -3.62377000 | 0.05728600  |
| H  | -1.66559500 | 5.51915000  | -0.07902600 |
| H  | -0.23210300 | 6.24818600  | 0.68312300  |
| H  | -0.38930000 | 6.23804800  | -1.09035400 |
| H  | 3.50160100  | 4.63742100  | -0.83333100 |
| H  | 2.34912900  | 5.98157500  | -0.96163800 |

|   |             |             |             |
|---|-------------|-------------|-------------|
| H | -5.96187500 | 2.23361100  | -0.81237400 |
| H | -4.97623500 | 2.97790000  | 0.46951200  |
| H | -4.69373000 | 3.40891200  | -1.23405800 |
| H | -6.07193200 | -1.26902800 | -0.57806600 |
| H | -1.98110500 | -5.96689800 | -1.13782500 |
| H | -3.12592600 | -4.89307100 | -0.29770100 |
| H | -2.85018000 | -4.70687400 | -2.04649500 |
| H | 1.38488700  | -5.86546300 | 0.46437000  |
| H | 6.09198900  | -2.17061400 | -0.26606800 |
| H | 4.99487000  | -3.05254000 | 0.82370200  |
| H | 4.87729300  | -3.28643400 | -0.93590800 |
| H | 5.68872500  | 1.73180500  | -0.59713900 |
| H | 6.51615700  | 0.35840100  | 0.10689200  |
| H | 2.85697700  | 5.40845900  | 0.64138100  |
| H | -5.17647400 | -1.22721700 | -1.91608900 |
| H | -6.28296200 | 0.23021500  | -1.49789200 |
| H | 1.66282500  | -5.35791600 | -1.08660000 |
| H | 0.16663200  | -6.37521400 | -0.71600400 |
| H | 6.07570000  | 0.25218100  | -1.58836000 |
| O | 0.20982500  | 0.11746100  | -2.25230300 |
| C | -1.92642400 | -0.72214500 | 4.73947700  |
| C | -1.01509400 | -0.46457700 | 3.58715500  |
| N | 0.31881000  | -0.09321600 | 3.72418600  |
| C | 0.84012700  | 0.13841500  | 2.49203700  |
| N | -0.09816100 | -0.06387000 | 1.56984100  |
| C | -1.24882000 | -0.44186100 | 2.23736700  |
| H | -2.94599800 | -0.84484600 | 4.37499400  |
| H | -1.84262400 | 0.13071800  | 5.41317700  |
| H | 0.82687000  | -0.00304000 | 4.60183000  |
| H | -2.17069600 | -0.66574400 | 1.71334000  |
| H | 1.86578100  | 0.43915000  | 2.30359900  |
| H | -1.66001400 | -1.64568400 | 5.25339000  |
| H | 0.19044300  | -0.79795300 | -2.60607900 |

**Table S8.** Cartesian coordinates of the MauG-2c model

|    |             |             |             |
|----|-------------|-------------|-------------|
| C  | -3.24582500 | 1.84481600  | 0.38811300  |
| C  | -2.10459900 | 2.56485000  | 0.02645100  |
| C  | -1.99738600 | 4.01845400  | 0.09051000  |
| C  | -3.11511900 | 4.94313800  | 0.53555800  |
| C  | -0.74125300 | 4.33664600  | -0.38635700 |
| C  | -0.12424100 | 5.71151300  | -0.56226700 |
| C  | -0.08694400 | 3.06547700  | -0.69188500 |
| N  | -0.93675600 | 2.01873400  | -0.44510700 |
| C  | 1.24896500  | 2.92986300  | -1.08515700 |
| C  | 1.96256600  | 1.73939700  | -1.22797900 |
| C  | 3.40145800  | 1.67046500  | -1.47050000 |
| C  | 4.28683400  | 2.87127600  | -1.68114600 |
| C  | 3.74951200  | 0.33913900  | -1.51097300 |
| C  | 5.16417800  | -0.24787800 | -1.46528700 |
| C  | 2.48969100  | -0.39440300 | -1.25795300 |
| N  | 1.44008200  | 0.48043000  | -1.09331000 |
| C  | 2.34942800  | -1.77993700 | -1.15832000 |
| C  | 1.15190300  | -2.47838900 | -0.95813500 |
| C  | 1.05676100  | -3.93734200 | -0.89362300 |
| C  | 2.27197100  | -4.83846800 | -0.90594000 |
| C  | -0.28994900 | -4.24867400 | -0.85540300 |
| C  | -0.97363900 | -5.59637500 | -0.65574500 |
| C  | -0.98412700 | -2.95984700 | -0.77635000 |
| N  | -0.09366000 | -1.91794600 | -0.84907000 |
| C  | -2.34430400 | -2.82387100 | -0.50773900 |
| C  | -3.00542900 | -1.64013100 | -0.16812300 |
| C  | -4.35989500 | -1.59712600 | 0.36548400  |
| C  | -5.22740300 | -2.82924500 | 0.52832000  |
| C  | -4.63050300 | -0.27221700 | 0.66740800  |
| C  | -5.85824700 | 0.30677500  | 1.39005600  |
| C  | -3.41706400 | 0.46480700  | 0.28981900  |
| N  | -2.45817700 | -0.38918700 | -0.19849600 |
| Fe | -0.54141200 | 0.05357200  | -0.73621700 |
| H  | -4.09333500 | 2.42099300  | 0.76705300  |
| H  | 1.81791800  | 3.85147200  | -1.23301900 |
| H  | 3.25725600  | -2.38134900 | -1.26194600 |
| H  | -2.93477300 | -3.74357200 | -0.46872600 |
| H  | 0.87868100  | 5.61577600  | -0.97832800 |
| H  | -0.74321600 | 6.30047800  | -1.23889500 |
| H  | -0.06946700 | 6.20865700  | 0.40660300  |
| H  | -3.79730800 | 4.40555600  | 1.19349800  |
| H  | -2.71174400 | 5.80448300  | 1.06717700  |

|   |             |             |             |
|---|-------------|-------------|-------------|
| H | 5.32504300  | 2.54555100  | -1.74915700 |
| H | 3.97675100  | 3.29737000  | -2.63547600 |
| H | 4.19285800  | 3.62409400  | -0.89930800 |
| H | 5.49787300  | -0.92868700 | -2.23422600 |
| H | 1.94121800  | -5.87306200 | -0.81241800 |
| H | 2.74430000  | -4.69462900 | -1.87819600 |
| H | 2.98977100  | -4.61393400 | -0.11688500 |
| H | -1.74893100 | -5.88061400 | -1.35089700 |
| H | -6.17159100 | -2.50031700 | 0.96339300  |
| H | -5.41127100 | -3.26188700 | -0.45470000 |
| H | -4.77069200 | -3.57834700 | 1.17449400  |
| H | -5.84143900 | 1.39665300  | 1.41696900  |
| H | -6.78542400 | 0.01637800  | 0.89709200  |
| H | -3.64716100 | 5.28618800  | -0.35141500 |
| H | 5.03616000  | -1.00605300 | -0.69320800 |
| H | 5.91214700  | 0.53114200  | -1.32010100 |
| H | -1.57648200 | -5.46952200 | 0.24335100  |
| H | -0.21768600 | -6.38022200 | -0.61404400 |
| H | -5.86057700 | -0.15121300 | 2.37889400  |
| C | 4.82563600  | -0.39744900 | 3.83852600  |
| C | 3.43756400  | -0.26397000 | 3.24571600  |
| C | 2.95733700  | 0.94856600  | 2.72503600  |
| C | 1.71628600  | 1.03331500  | 2.09504500  |
| C | 0.89106400  | -0.11547900 | 1.92525900  |
| O | -0.24323000 | -0.08571800 | 1.26394000  |
| C | 1.35235400  | -1.32135100 | 2.52909500  |
| C | 2.59434500  | -1.38672200 | 3.15603800  |
| H | 5.46548600  | 0.40764600  | 3.47782200  |
| H | 5.20537200  | -1.37210800 | 3.53179000  |
| H | 3.58648600  | 1.84711600  | 2.79121600  |
| H | 2.93781100  | -2.34788800 | 3.56481700  |
| H | 1.37148700  | 1.98112700  | 1.67235500  |
| H | 0.72232300  | -2.21166900 | 2.43369800  |
| H | 4.79544300  | -0.32411800 | 4.92561600  |
| O | -0.91533900 | 0.14617900  | -2.36852900 |

**Table S9.** Cartesian coordinates of the MauG-2d model

|    |             |             |             |
|----|-------------|-------------|-------------|
| C  | -3.25293100 | 1.84533500  | 0.42083200  |
| C  | -2.11567300 | 2.56569900  | 0.05222800  |
| C  | -2.01076500 | 4.01786600  | 0.10067700  |
| C  | -3.12846900 | 4.94209900  | 0.54430600  |
| C  | -0.75296400 | 4.33830500  | -0.37726100 |
| C  | -0.13898300 | 5.71641100  | -0.55313900 |
| C  | -0.09291200 | 3.07080300  | -0.67339800 |
| N  | -0.94255100 | 2.01662000  | -0.41654100 |
| C  | 1.24076400  | 2.93932100  | -1.06708900 |
| C  | 1.95721600  | 1.75127700  | -1.20951600 |
| C  | 3.39161100  | 1.68331200  | -1.46139800 |
| C  | 4.27634400  | 2.88436400  | -1.67600200 |
| C  | 3.74313700  | 0.35005300  | -1.49935800 |
| C  | 5.15860500  | -0.23365800 | -1.46385700 |
| C  | 2.49241800  | -0.38812100 | -1.23778200 |
| N  | 1.43824200  | 0.48731400  | -1.06245700 |
| C  | 2.35517000  | -1.77423200 | -1.14972600 |
| C  | 1.15587700  | -2.47399900 | -0.97271100 |
| C  | 1.05761200  | -3.92837700 | -0.89911200 |
| C  | 2.27368100  | -4.82940600 | -0.90928100 |
| C  | -0.29175200 | -4.24169000 | -0.86164100 |
| C  | -0.97069700 | -5.59267800 | -0.65941200 |
| C  | -0.98942300 | -2.95696300 | -0.79636100 |
| N  | -0.09773200 | -1.90967500 | -0.89067400 |
| C  | -2.34505500 | -2.82012100 | -0.50817500 |
| C  | -3.00003100 | -1.64086900 | -0.14879300 |
| C  | -4.35868600 | -1.60039800 | 0.37297900  |
| C  | -5.22858700 | -2.83356700 | 0.52852800  |
| C  | -4.63192000 | -0.27620300 | 0.68187100  |
| C  | -5.86419300 | 0.30047400  | 1.39395700  |
| C  | -3.41864800 | 0.46613300  | 0.32301100  |
| N  | -2.45006900 | -0.38545100 | -0.15856500 |
| Fe | -0.52979200 | 0.06632800  | -0.64699500 |
| H  | -4.10247200 | 2.41986700  | 0.79375300  |
| H  | 1.80353800  | 3.86165100  | -1.22552600 |
| H  | 3.26347700  | -2.37362100 | -1.25118900 |
| H  | -2.93589800 | -3.73826200 | -0.46919700 |
| H  | 0.86401800  | 5.62271900  | -0.96947600 |
| H  | -0.75899300 | 6.30517900  | -1.22899000 |
| H  | -0.08482300 | 6.21253200  | 0.41629000  |
| H  | -3.80970500 | 4.40269800  | 1.20174400  |
| H  | -2.72635300 | 5.80346600  | 1.07684200  |

|   |             |             |             |
|---|-------------|-------------|-------------|
| H | 5.31505000  | 2.56034200  | -1.74455900 |
| H | 3.96543300  | 3.31106300  | -2.62979200 |
| H | 4.18132100  | 3.63613900  | -0.89328700 |
| H | 5.49323600  | -0.91306400 | -2.23363100 |
| H | 1.94456400  | -5.86462300 | -0.81688700 |
| H | 2.74562100  | -4.68371600 | -1.88145000 |
| H | 2.99126200  | -4.60465100 | -0.12008900 |
| H | -1.74566000 | -5.87733500 | -1.35475800 |
| H | -6.17321500 | -2.50661500 | 0.96413500  |
| H | -5.41194300 | -3.26537100 | -0.45495500 |
| H | -4.77059500 | -3.58269100 | 1.17376800  |
| H | -5.84908600 | 1.39034600  | 1.42211400  |
| H | -6.79099700 | 0.00919000  | 0.90081500  |
| H | -3.66119800 | 5.28533100  | -0.34218600 |
| H | 5.03190400  | -0.99291500 | -0.69262600 |
| H | 5.90537800  | 0.54636500  | -1.31790600 |
| H | -1.57358600 | -5.46779800 | 0.23993000  |
| H | -0.21351000 | -6.37538900 | -0.61873300 |
| H | -5.86564000 | -0.15864800 | 2.38227000  |
| C | 4.82119100  | -0.38982500 | 3.83983700  |
| C | 3.43446700  | -0.26022900 | 3.25291200  |
| C | 2.98327600  | 0.93568100  | 2.66934700  |
| C | 1.76333800  | 1.00103200  | 2.00212800  |
| C | 0.95075500  | -0.15320600 | 1.89144500  |
| O | -0.17126900 | -0.17590000 | 1.18454100  |
| C | 1.35020100  | -1.33056000 | 2.57360600  |
| C | 2.57657900  | -1.37707100 | 3.22518100  |
| H | 5.45972000  | 0.41668300  | 3.47994700  |
| H | 5.20240100  | -1.36353600 | 3.53192300  |
| H | 3.61992500  | 1.82703200  | 2.70955400  |
| H | 2.89789500  | -2.31303000 | 3.69760900  |
| H | 1.43089200  | 1.92798400  | 1.53103200  |
| H | 0.70056700  | -2.20800700 | 2.51702100  |
| H | 4.79106700  | -0.31778500 | 4.92701600  |
| O | -0.93342500 | 0.19945900  | -2.41191300 |
| H | -0.50000900 | -0.54813900 | -2.87502300 |

**Table S10.** Cartesian coordinates of the MauG-2e model

|    |               |               |               |
|----|---------------|---------------|---------------|
| C  | -2.5909207826 | -0.8214881409 | -2.8386582647 |
| C  | -2.039696145  | -1.8721783834 | -2.1156386026 |
| C  | -2.30162174   | -3.2753128333 | -2.384718185  |
| C  | -1.609515689  | -3.9917001956 | -1.4316583726 |
| C  | -0.9170649841 | -3.0173141979 | -0.6073317065 |
| N  | -1.1968671438 | -1.7318629778 | -1.0326309509 |
| C  | -0.0532705976 | -3.3474130857 | 0.4284580785  |
| C  | 0.709100152   | -2.4437052368 | 1.161233409   |
| C  | 1.6613770833  | -2.8252799043 | 2.184831392   |
| C  | 2.2398509849  | -1.6558757042 | 2.6388467009  |
| C  | 1.616828496   | -0.5750491246 | 1.9012227309  |
| N  | 0.6915036165  | -1.070957886  | 0.999494625   |
| C  | 1.8678363155  | 0.7734642039  | 2.1274832661  |
| C  | 1.204071273   | 1.8258328293  | 1.5073120671  |
| C  | 1.4230523727  | 3.2266095363  | 1.8175916809  |
| C  | 0.5524607917  | 3.9430409253  | 1.022793905   |
| C  | -0.1720006733 | 2.9696169621  | 0.2248959731  |
| N  | 0.2328467981  | 1.6886102015  | 0.5362177926  |
| C  | -1.1089363049 | 3.2988007829  | -0.7482937572 |
| C  | -1.7589234183 | 2.3951582386  | -1.5787588108 |
| C  | -2.6439579432 | 2.7793066514  | -2.6617499296 |
| C  | -3.0389881745 | 1.61005104    | -3.2799782398 |
| C  | -2.4054931154 | 0.5260642405  | -2.553717426  |
| N  | -1.628535489  | 1.018292102   | -1.5208899677 |
| Fe | -0.4355362677 | -0.0247369845 | -0.2940298352 |
| H  | -3.2337820046 | -1.0739595694 | -3.6842396026 |
| H  | 0.0672434947  | -4.4075282855 | 0.6609776704  |
| H  | 2.6244006888  | 1.0254780008  | 2.8732763928  |
| H  | -1.3199507686 | 4.3592823647  | -0.9008950894 |
| C  | 6.49939       | -0.002895     | -0.493862     |
| C  | 5.0362696904  | -0.018031997  | -0.8722269185 |
| C  | 4.3217559194  | -1.2284408014 | -0.9825943813 |
| C  | 2.9543380468  | -1.2402203322 | -1.2305454276 |
| C  | 2.2522100656  | -0.0173941086 | -1.3676340445 |
| O  | 0.9295628679  | -0.0090624287 | -1.5267486444 |
| C  | 2.9749328374  | 1.2013831756  | -1.3485898413 |
| C  | 4.3419392207  | 1.1886221646  | -1.1012918351 |
| H  | 6.742407      | -0.915937     | 0.049268      |
| H  | 6.689118      | 0.881565      | 0.114398      |
| H  | 4.8501154968  | -2.1780295767 | -0.8464479019 |
| H  | 4.8873152597  | 2.1375734108  | -1.0577193754 |
| H  | 2.3968614255  | -2.1777065712 | -1.2925695697 |
| H  | 2.4322223417  | 2.1377860937  | -1.4976147004 |
| H  | 7.115621      | 0.012346      | -1.392795     |
| C  | -3.290787     | -0.119766     | 4.596071      |
| C  | -2.9130844099 | -0.0475497711 | 3.1494264092  |
| N  | -3.8505463503 | -0.0056902731 | 2.1210445437  |
| C  | -3.2012128716 | 0.0156681863  | 0.929689758   |
| N  | -1.8874059488 | -0.0128662538 | 1.1399995748  |
| C  | -1.6970636627 | -0.0495623821 | 2.5113531399  |
| H  | -2.389867     | -0.188558     | 5.205205      |
| H  | -3.935883     | -0.987087     | 4.73705       |
| H  | -4.8619012179 | 0.0076265067  | 2.2365907291  |
| H  | -0.7055311681 | -0.0777850358 | 2.9499622792  |
| H  | -3.6914105815 | 0.0481243835  | -0.0382216025 |

|   |               |               |               |
|---|---------------|---------------|---------------|
| H | -3.805172     | 0.794253      | 4.892688      |
| C | 1.9284444869  | -4.2346700442 | 2.6185189142  |
| H | 1.0132722587  | -4.7236290119 | 2.9954827924  |
| H | 2.3102896658  | -4.8516770104 | 1.7862218737  |
| H | 2.6756291199  | -4.2736673111 | 3.424471824   |
| C | 3.2931237271  | -1.4751023715 | 3.6892731175  |
| H | 4.1796438728  | -0.9546505918 | 3.2878159637  |
| H | 2.9220019811  | -0.8794169063 | 4.5419226985  |
| H | 3.6331669935  | -2.4412683807 | 4.0897217902  |
| C | 2.4158108371  | 3.7317283448  | 2.8200770065  |
| H | 2.2063721004  | 3.3451275309  | 3.832882871   |
| H | 3.4446987146  | 3.4277511232  | 2.5594257893  |
| H | 2.4043209019  | 4.8297413311  | 2.880770807   |
| C | 0.3562456129  | 5.4265512718  | 0.9422594973  |
| H | 0.6095460796  | 5.8178077908  | -0.0588646151 |
| H | -0.690252541  | 5.709808007   | 1.1500157241  |
| H | 0.9887811867  | 5.9566269723  | 1.669238673   |
| C | -3.0009493184 | 4.1919884422  | -3.0110139174 |
| H | -3.4412565001 | 4.726078915   | -2.151040032  |
| H | -2.1144209166 | 4.7653872736  | -3.3345848091 |
| H | -3.7324253372 | 4.2316449037  | -3.8311415144 |
| C | -3.9283946903 | 1.4302384656  | -4.4720707978 |
| H | -3.3880543745 | 0.9550044042  | -5.3096110033 |
| H | -4.8000215891 | 0.792865442   | -4.2413445765 |
| H | -4.314317856  | 2.3931572398  | -4.8369748598 |
| C | -3.1610164294 | -3.7804882373 | -3.5030535132 |
| H | -4.1976647131 | -3.4085470218 | -3.4226141125 |
| H | -2.7730655561 | -3.4608630029 | -4.486090053  |
| H | -3.20681325   | -4.8791807665 | -3.5113310574 |
| C | -1.5280690951 | -5.4765551747 | -1.2474217674 |
| H | -0.4995407293 | -5.8492095347 | -1.3980523648 |
| H | -1.8423258784 | -5.7794937352 | -0.2334067315 |
| H | -2.1747859608 | -6.0065816728 | -1.9618223203 |

**Table S11.** Cartesian coordinates of the MauG-2f model

|    |               |               |               |
|----|---------------|---------------|---------------|
| Fe | 0.2924288404  | 0.0110685337  | -0.0010955582 |
| N  | -0.5386420481 | -1.224219848  | 1.3227423977  |
| N  | 1.0911984061  | -1.5806776294 | -0.9543318482 |
| N  | 1.2183903816  | 1.2548626456  | -1.2877526794 |
| N  | -0.405150389  | 1.5866106827  | 0.9955325304  |
| C  | -1.142316986  | -0.8705214923 | 2.517840389   |
| C  | -1.6212829081 | -2.049314233  | 3.1943139743  |
| H  | -2.1381062858 | -2.0473348221 | 4.1538570278  |
| C  | -1.3253270774 | -3.1200405746 | 2.3943269052  |
| H  | -1.5430732922 | -4.173389496  | 2.5696638374  |
| C  | -0.6303002316 | -2.6069524169 | 1.2421505218  |
| C  | -0.0513176589 | -3.395458153  | 0.2531537494  |
| C  | 0.7796657556  | -2.9111463696 | -0.7544181965 |
| C  | 1.4966463842  | -3.7344323827 | -1.6972768158 |
| H  | 1.4248610701  | -4.8202368188 | -1.7565084879 |
| C  | 2.257782089   | -2.8915549292 | -2.4600547422 |
| H  | 2.9316173844  | -3.1452183434 | -3.2782098908 |
| C  | 1.9835413039  | -1.5485295398 | -2.0057854582 |
| C  | 2.486317992   | -0.3980021757 | -2.6062437254 |
| C  | 2.0911482131  | 0.8996841261  | -2.2953195454 |
| C  | 2.4750930134  | 2.0696485234  | -3.0493339307 |
| H  | 3.1583042794  | 2.0649942336  | -3.898395632  |
| C  | 1.8008835811  | 3.1311246149  | -2.5104710603 |
| H  | 1.8247639131  | 4.1752424479  | -2.8215062688 |
| C  | 1.0284041746  | 2.6178209474  | -1.4063287819 |
| C  | 0.2602686549  | 3.3968489532  | -0.5446402389 |
| C  | -0.3687022972 | 2.9160649592  | 0.5984924772  |
| C  | -0.9936719502 | 3.74342356    | 1.5978689601  |
| H  | -1.1067116161 | 4.8249200033  | 1.5260044893  |
| C  | -1.3754178301 | 2.9179628826  | 2.6206668799  |
| H  | -1.8725038373 | 3.1856305956  | 3.5528494842  |
| C  | -1.0205704695 | 1.5751337921  | 2.2355559497  |
| C  | -1.329786344  | 0.4331053804  | 2.96892565    |
| H  | -0.2124257637 | -4.4748033915 | 0.3055120982  |
| H  | 3.1869460209  | -0.5266844671 | -3.4347269422 |
| H  | 0.1990059998  | 4.4689663227  | -0.74547514   |
| H  | -1.8186960929 | 0.5690423214  | 3.9365632549  |
| C  | 2.5433406268  | -0.972438369  | 1.7190174658  |
| H  | 2.2230349517  | -2.0068448419 | 1.6464324176  |
| N  | 1.9466055022  | 0.0774253888  | 1.1500152769  |
| C  | 2.6788502358  | 1.2014240227  | 1.4952937293  |
| C  | 3.7329671284  | 0.8192627999  | 2.2850567208  |
| N  | 3.6276943502  | -0.555015862  | 2.4129379522  |
| H  | 2.401093065   | 2.1934745798  | 1.1555384183  |
| H  | 4.2572095802  | -1.1576132472 | 2.9389425086  |
| C  | -2.4316779738 | -0.078215805  | -1.2610858411 |
| C  | -2.9816384305 | -0.2964159288 | -2.5628585164 |
| C  | -3.3127875488 | 0.1212757496  | -0.1607331387 |
| C  | -4.3566985867 | -0.3157373981 | -2.7441251473 |
| H  | -2.2901742084 | -0.4455226379 | -3.3956228471 |
| C  | -4.6872960441 | 0.0985958998  | -0.3675454877 |
| H  | -2.9045144334 | 0.2949497439  | 0.8344902901  |
| C  | -5.2197589213 | -0.1196829976 | -1.6503383324 |
| H  | -4.7689340266 | -0.4842214946 | -3.7429653685 |
| H  | -5.3606924027 | 0.2539520876  | 0.4802600877  |

|   |               |               |               |
|---|---------------|---------------|---------------|
| O | -1.1168459914 | -0.0701646765 | -1.1795677672 |
| H | -6.3028702709 | -0.1353761449 | -1.7977048907 |
| H | 4.5291751971  | 1.3885828601  | 2.7552422352  |

Table S12. AIM results of some hydrogen bonds (HBs) in proteins

| Models                                    | HB distance | $\rho(\mathbf{r})$ (au) | $G(\mathbf{r})$ (au) | $-V(\mathbf{r})$ (au) | $\nabla^2\rho(\mathbf{r})$ (au) | $H(\mathbf{r})$ (au) |
|-------------------------------------------|-------------|-------------------------|----------------------|-----------------------|---------------------------------|----------------------|
| protein backbone HBs <sup>a</sup>         |             | 0.012~0.025             | 0.004~0.026          | 0.003~0.024           | 0.020~0.109                     | 0.001~0.003          |
| MauG <b>1c</b> : H <sub>Gln103</sub> ...O | 2.322       | 0.012                   | 0.010                | 0.009                 | 0.043                           | 0.001                |
| MauG <b>1d</b> : H <sub>Gln103</sub> ...O | 2.034       | 0.020                   | 0.018                | 0.017                 | 0.074                           | 0.001                |
| MauG <b>1e</b> : H <sub>Gln103</sub> ...O | 2.206       | 0.015                   | 0.012                | 0.011                 | 0.052                           | 0.001                |
| MauG <b>1e</b> : H <sub>Pro107</sub> ...O | 2.182       | 0.017                   | 0.014                | 0.013                 | 0.059                           | 0.001                |

<sup>a</sup>Reference S12.
